# Supplementary material
Source: PubMed Central journal article supplement (PMC3330829)
Supplement: NIHMS154861-supplement-01.pdf [file NIHMS154861-supplement-01.pdf]

## Supplemental Data

### Supplemental Figures and Legends:

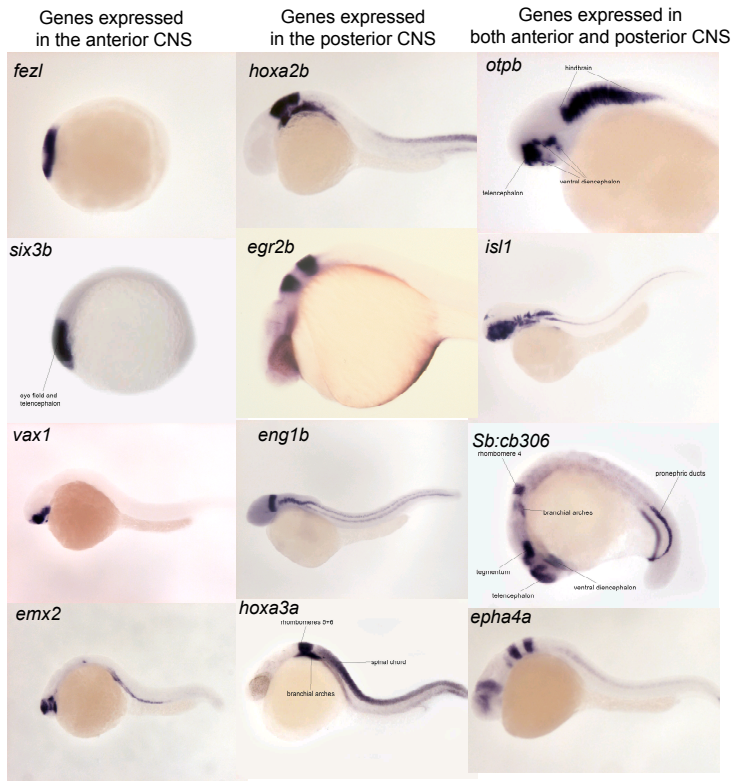

**Figure S1. Selected images showing brain region-specific gene expression.** Images were taken with permission from zfin gene expression database (Thisse and Thisse, 2005).

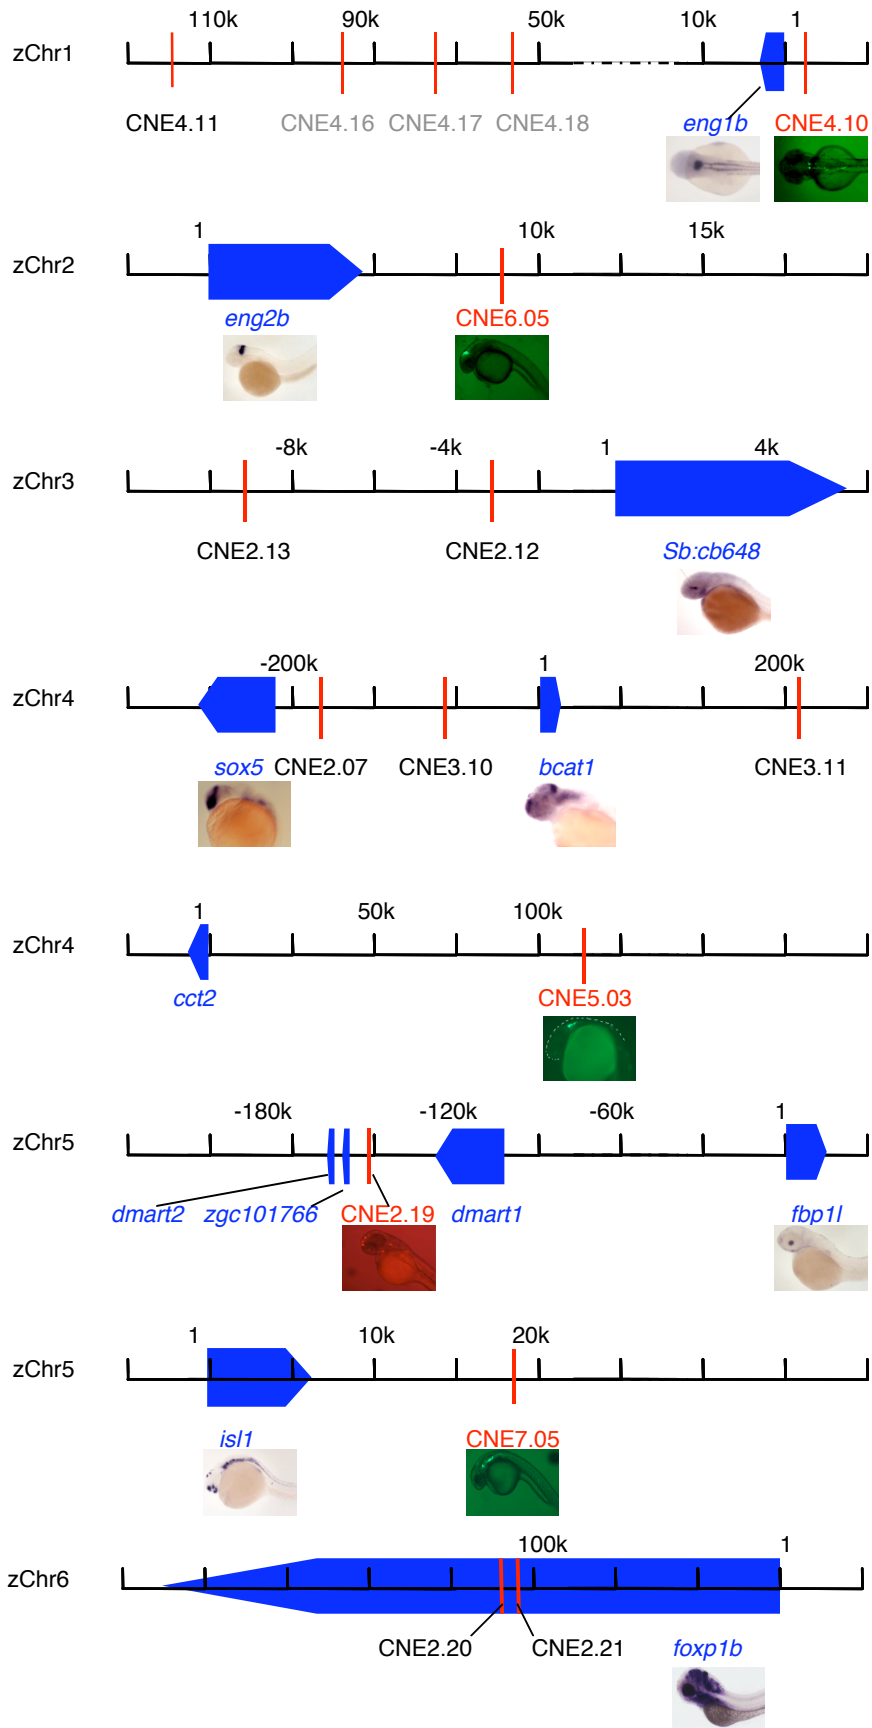

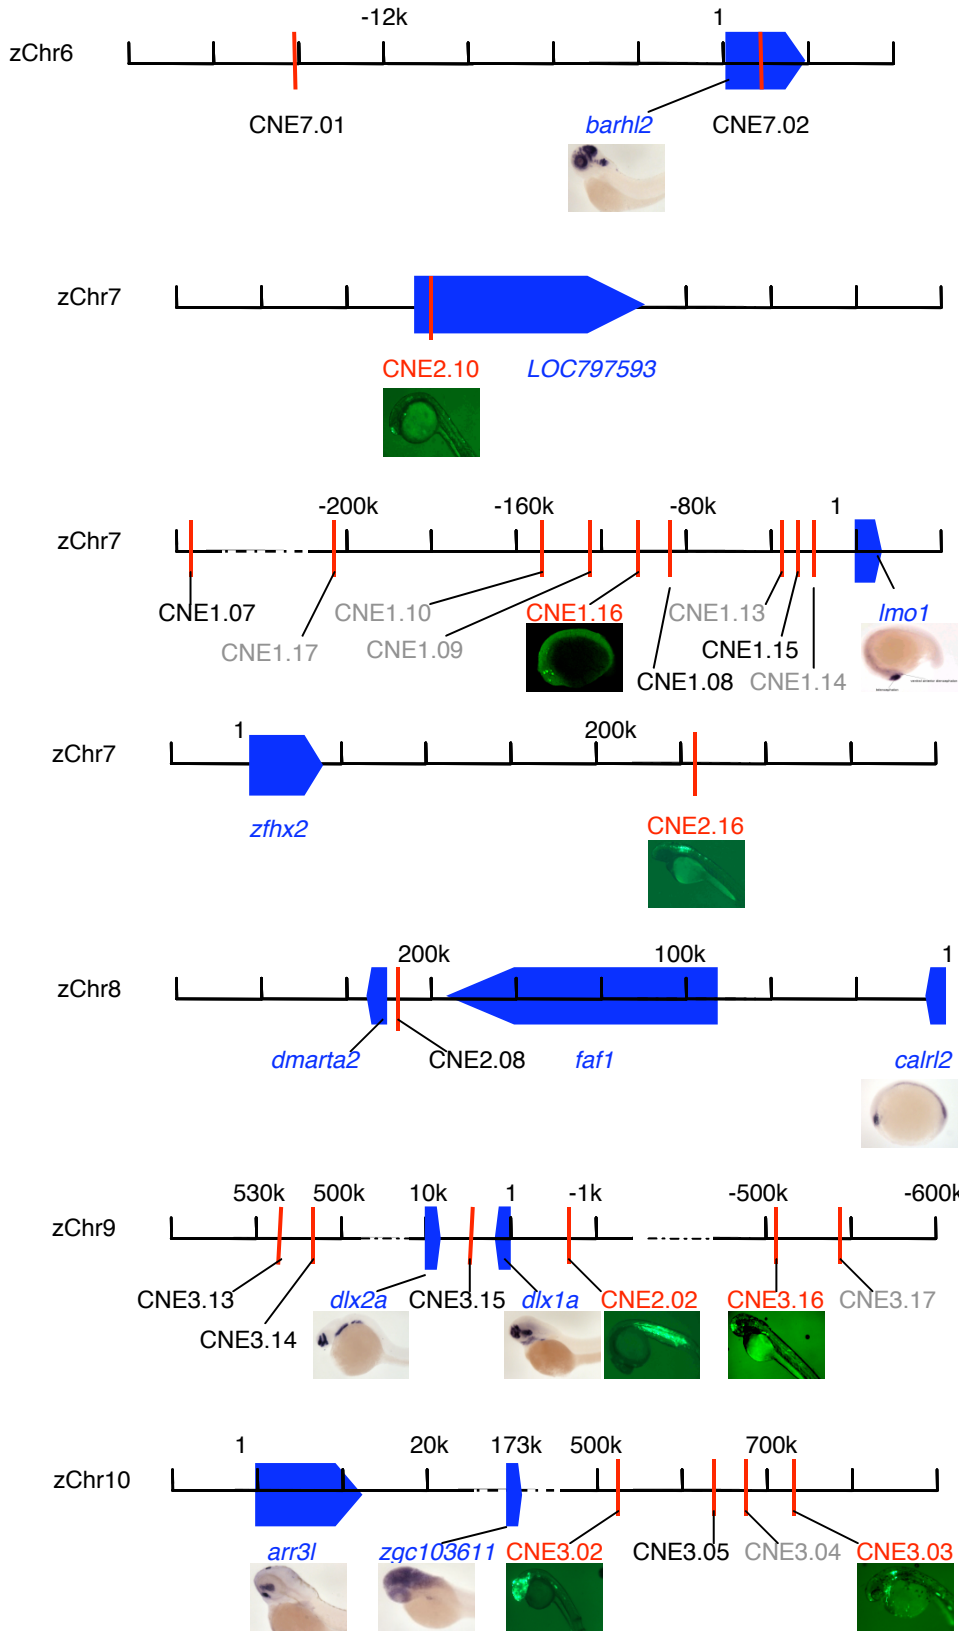

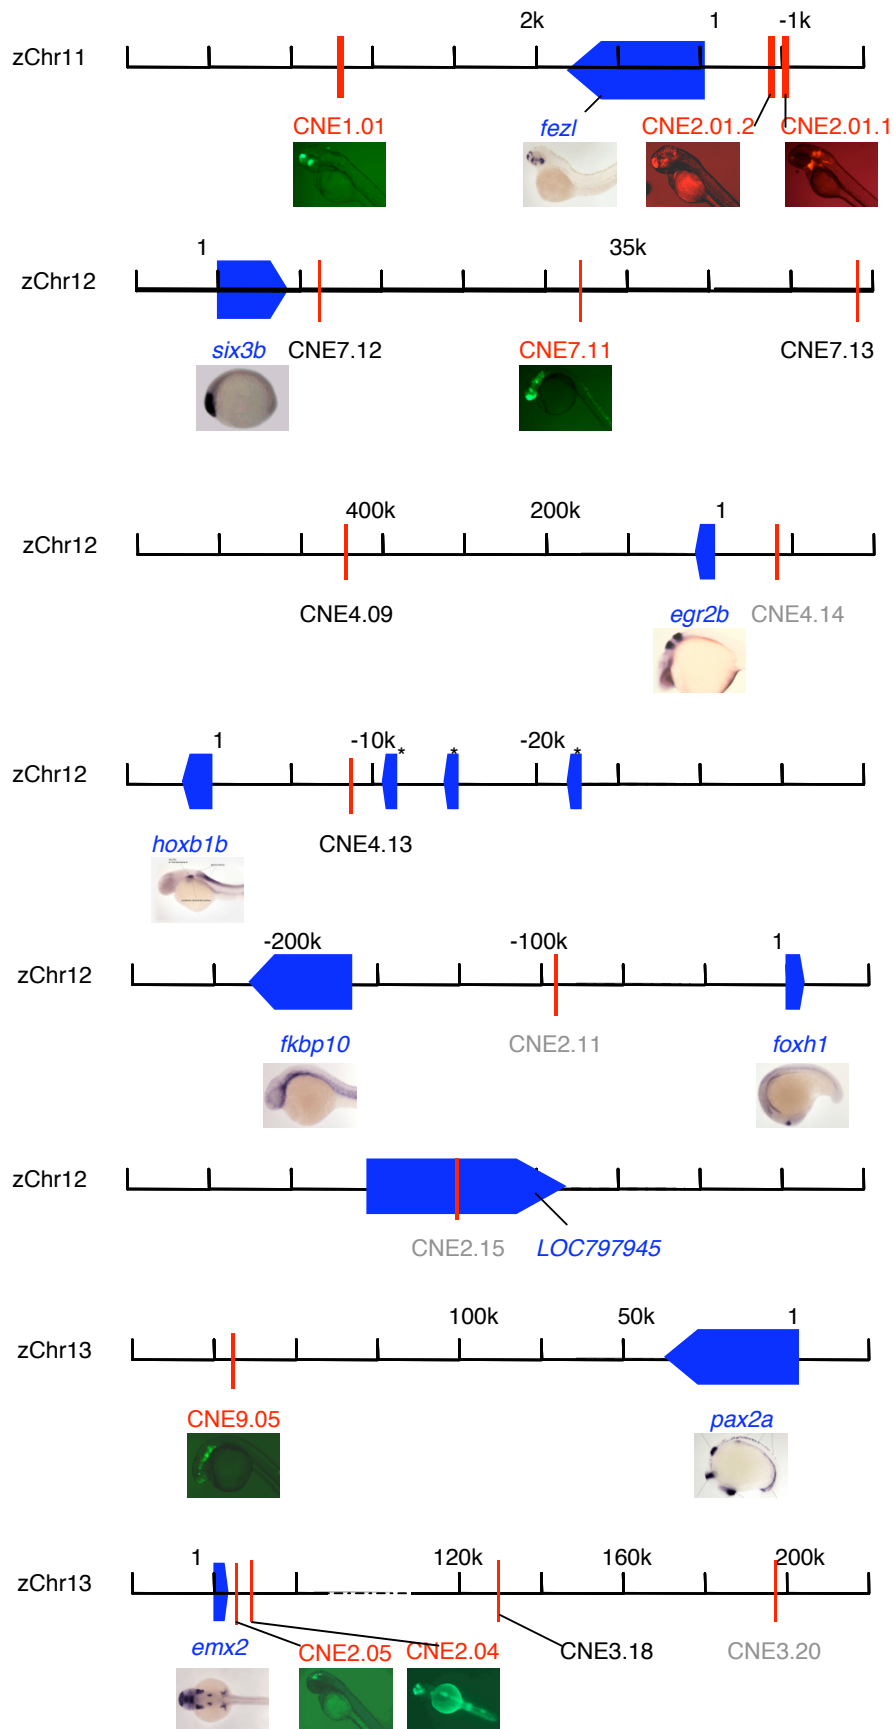

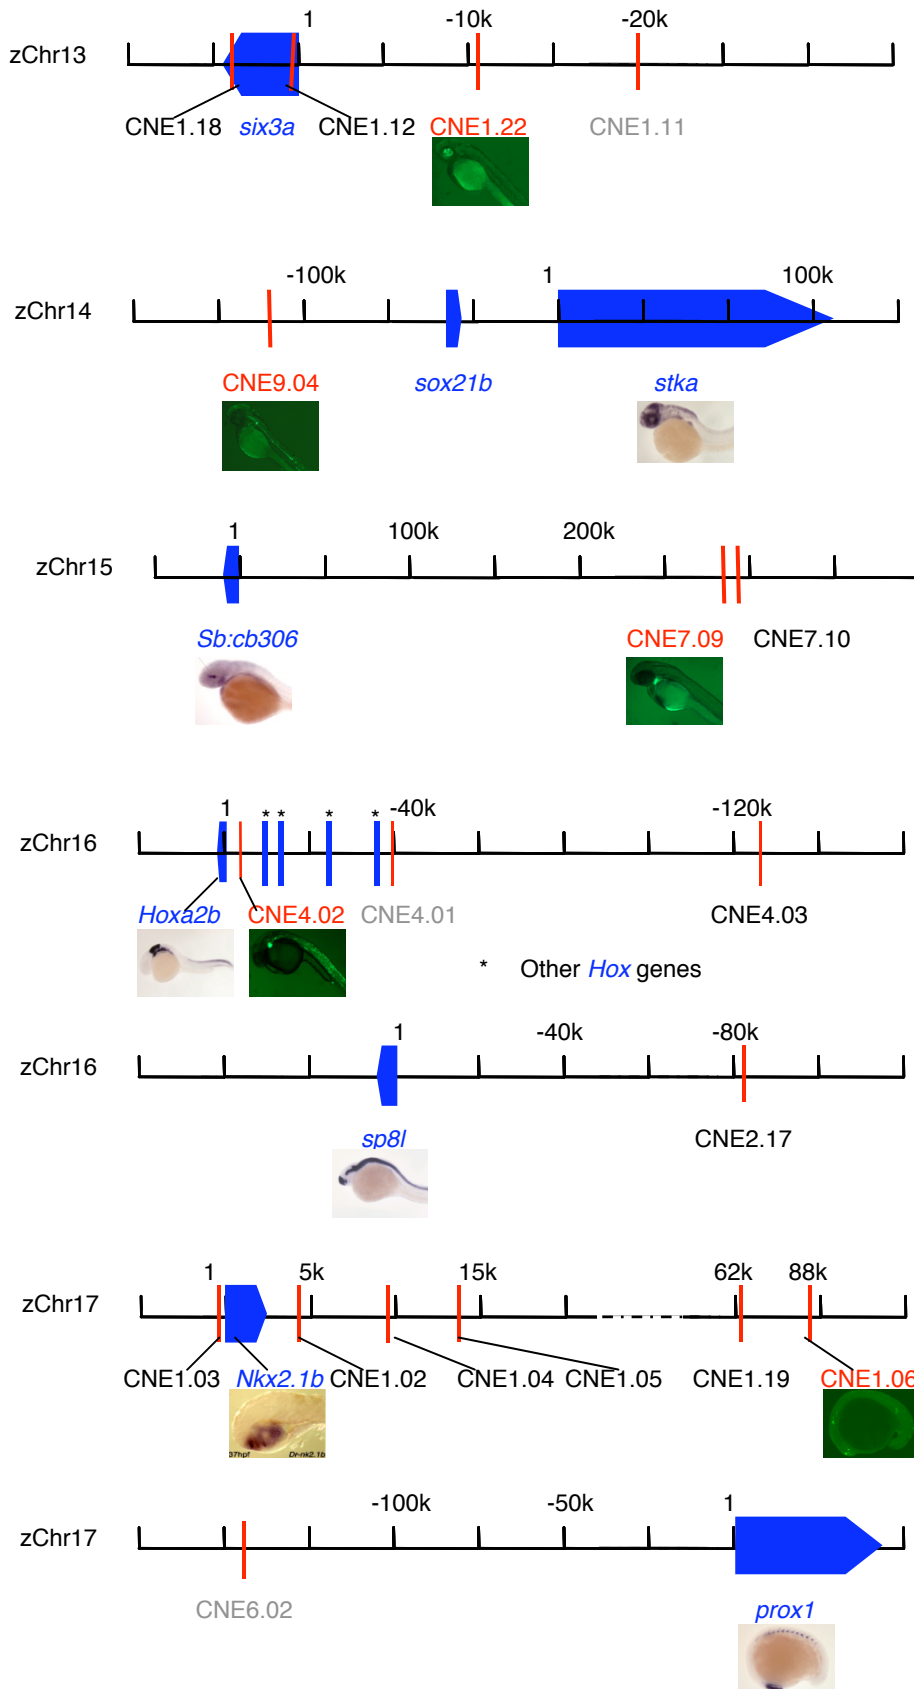

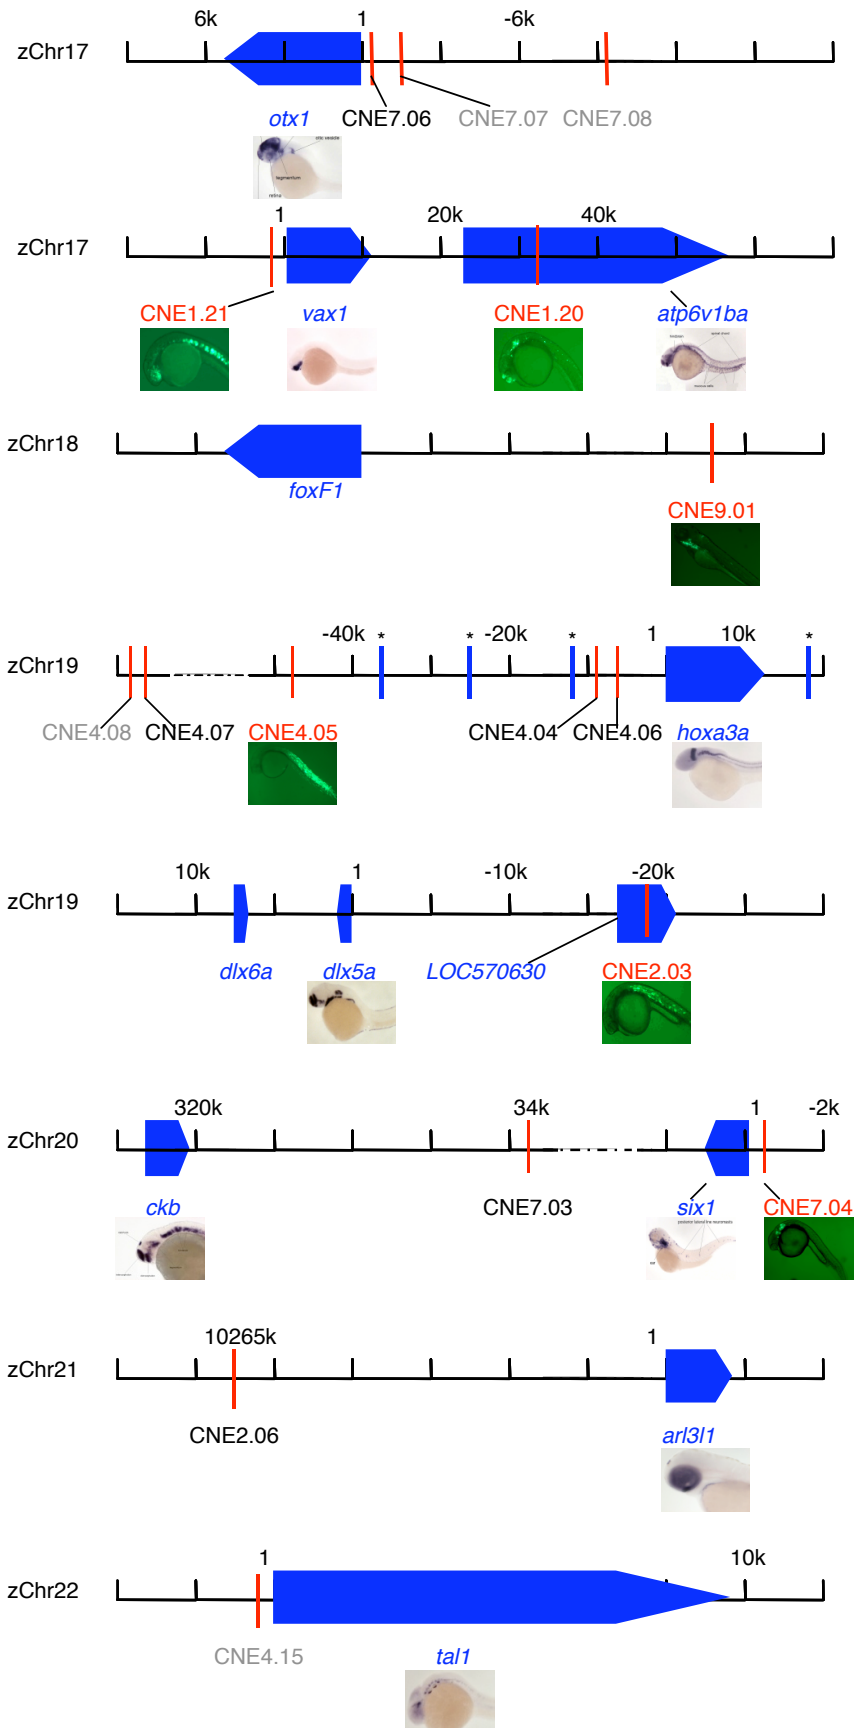

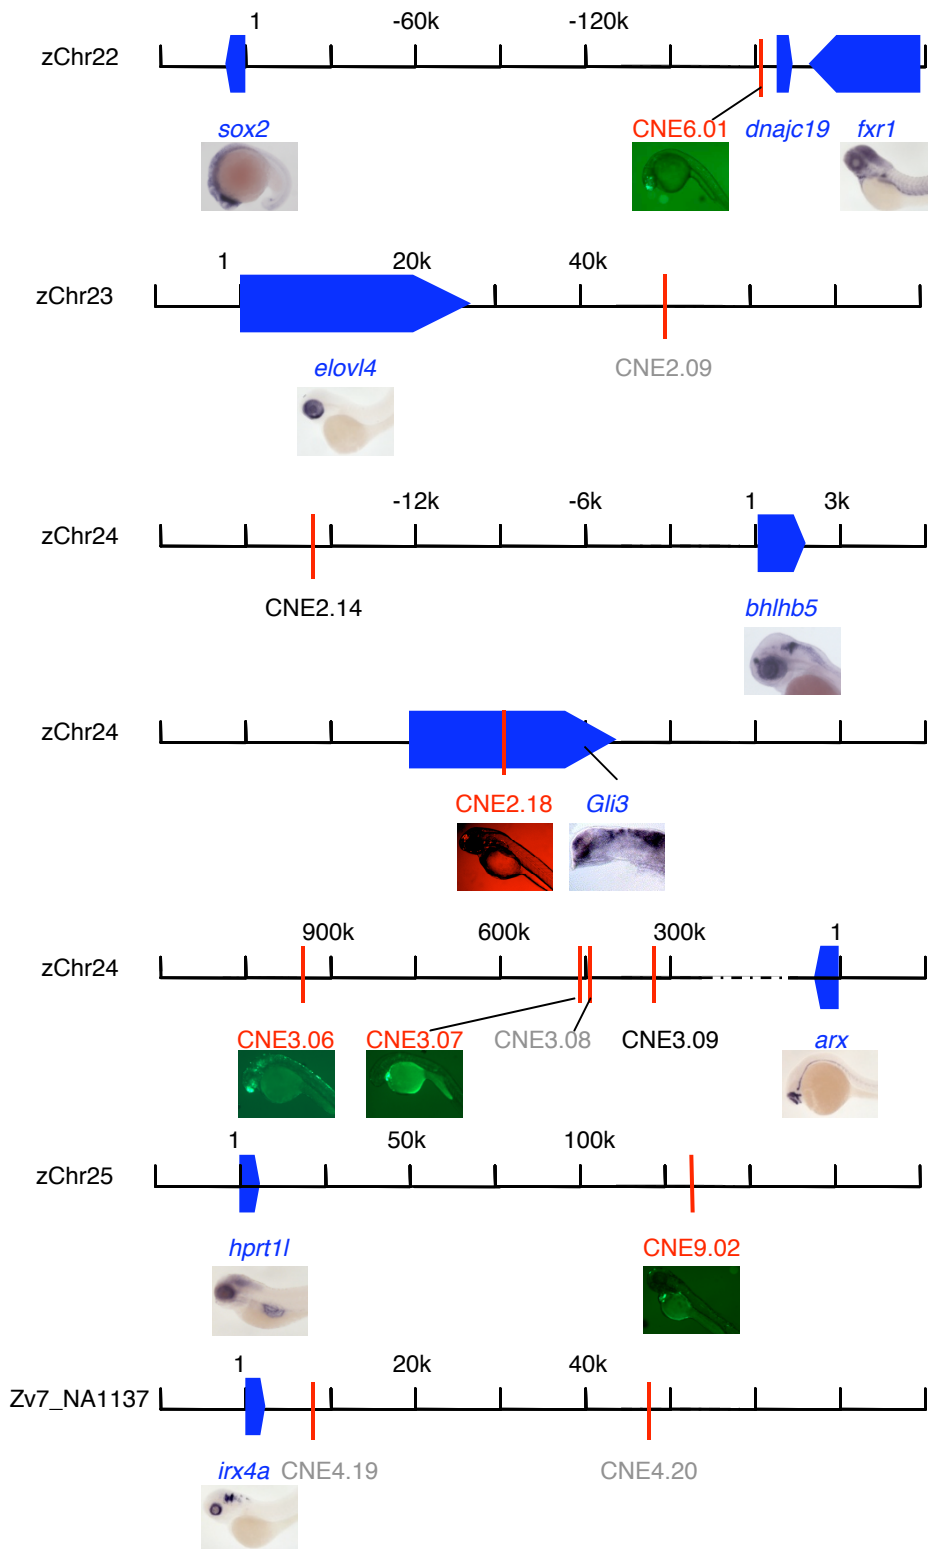

**Figure S2. Schematic diagrams depicting the chromosomal location and activity of analyzed CNEs, as well as their nearby brain-expressed genes.**

An GFP image of living zebrafish embryos was shown for the CNEs with region-specific enhancer activity. CNEs with no enhancer activity are labeled in gray. Images were not shown for CNEs with broad enhancer activity.

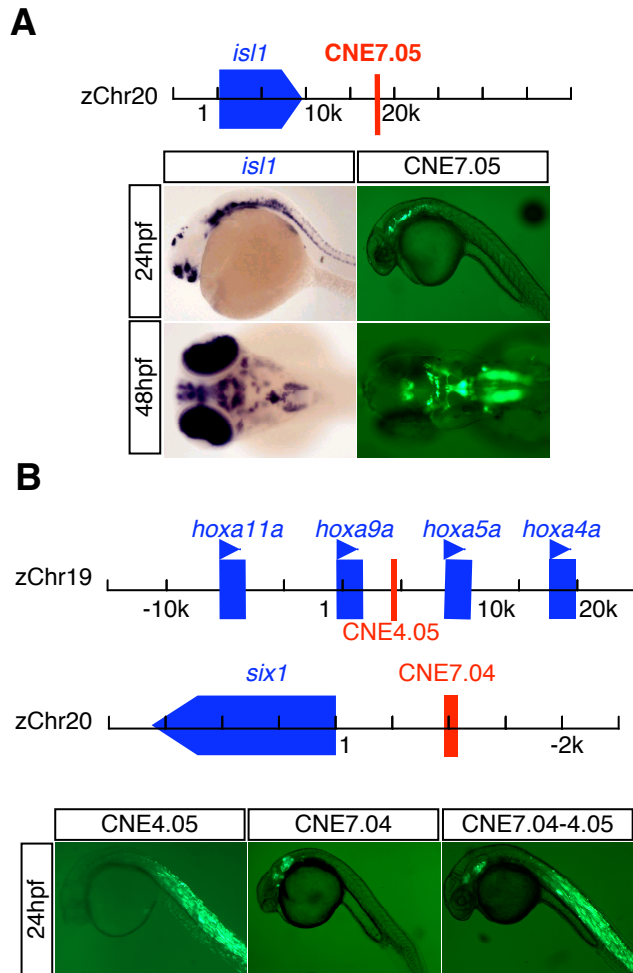

**Figure S3. CNEs as versatile tools to driving gene expression in desired tissues.**

(A) CNE7.05 displays activity in subsets of cells expressing the *islet1* gene.

(B) Combined activity is observed when CNE7.04 and 4.05 were used together to drive reporter expression.



Supplementary online text:

TRANSFAC predicted factors that bind to motifs (Table 4)

- A. Our functional study showed that the motif TTCATT (AATGAA in reverse complement) is essential for the telencephalic and diencephalic enhancer activity of CNE1.01 (Figure 6B, Panel 2). In TRANSFAC, TTCATT is predicted as a binding site for ICSBP/IRF. IRFs (interferon regulatory factor) are a nine-member family of transcription factors that share a highly conserved helix-turn-helix DNA-binding domain and a less conserved protein-binding domain. The IRFs exert diverse functions through homo- or hetero-dimer formation or interaction with other transcription factors. These functions include the regulation of host defense pathways such as the innate and adaptive immune responses, and oncogenesis (Nguyen et al., 1997; Taniguchi et al., 2001). In zebrafish, the expression of IRF2 (broad expression), 2a (broad expression), 4b (brain-enriched), 5 (broad), 6 (non-neural tissue), 7 (multiple regions including telencephalon and midbrain), 9 (broad), 10 (broad) have been characterized (ZFIN gene expression database)(Ben et al., 2005; Thisse and Thisse, 2005), but their function in brain development is not known. Based on the expression patterns, 4b and 7 represent candidates for future studies.
- B. Our functional study showed that the motif TCCATT (reverse complement: AATGGA) is essential for the telencephalic and diencephalic enhancer activity of CNE1.01 (Figure 6B, Panel 5). In TRANSFAC, TCCATT is predicted as a binding site for YY1. The transcription factor Yin Yang 1 (YY1) is a multifunctional protein that can activate or repress gene expression depending on the cellular context. YY1 is ubiquitously expressed and highly conserved between species. However, its role varies in different cell types and includes proliferation, differentiation, and apoptosis (He and Casaccia-Bonnel, 2008). In mice, Acetylated YY1 is shown to regulate *Otx2* expression in anterior neuroectoderm (Takasaki et al., 2007). In zebrafish, both YY1a and YY1b show broad but brain-enriched expression (Thisse and Thisse, 2005), although their functions are unknown. Based on this information, YY1 represents a candidate factor for future study.
- C. Our functional study showed that the motif CTGAAA (reverse complement: TTTCAG) is present in two copies in CNE2.01.2. Together they are essential for the CNE enhancer activity in the forebrain (Figure 5B). In TRANSFAC, CTGAAA is predicted as a binding site for FOXP3, a forkhead transcription factor critical for the development of regulatory T cells (Curiel, 2007). In zebrafish, *foxp3* expression shows a non-specific pattern during early development. There is no report on the role of FoxP3 in zebrafish or in brain development.
- D. Our functional study showed that the motif CCCCTC (reverse complement: GAGGGG) is essential to repress ectopic enhancer activity in the eyes and trunk. In TRANSFAC, CCCCTC is predicted as a binding site for MZF1 (Myeloid zinc finger 1). MZF1 is a bi-functional transcriptional regulator, repressing transcription in non-hematopoietic cells, and activating transcription in cells of

- hematopoietic origins (Hromas et al., 1996). However, its expression and function is unknown in zebrafish.
- E. Our functional study showed that the motif CCGCTC (reverse complement: GAGCGG) is essential for the telencephalic and diencephalic enhancer activity of CNE1.01 (Figure 6B, Panel 4). In TRANSFAC, CCGCTC is predicted as a binding site for Pax1. Pax1 is involved in vertebral skeletal development (Bannykh et al., 2003), but no information is available for its expression or function in zebrafish.

## References:

- Bannykh, S. I., Emery, S. C., Gerber, J. K., Jones, K. L., Benirschke, K., Masliah, E., 2003. Aberrant Pax1 and Pax9 expression in Jarcho-Levin syndrome: report of two Caucasian siblings and literature review. . *Am. J. Med. Genet. A.* 120A(2), 241-6.
- Ben, J., Jabs, E. W., Chong, S. S., 2005. Genomic, cDNA and embryonic expression analysis of zebrafish IRF6, the gene mutated in the human oral clefting disorders Van der Woude and popliteal pterygium syndromes. . *Gene Expr. Patterns.* 5, 629-38.
- Curiel, T. J., 2007. Regulatory T-cell development: is Foxp3 the decider? *Nat. Med.* 13, 250.
- He, Y., Casaccia-Bonnel, P., 2008. The Yin and Yang of YY1 in the nervous system. . *J. Neurochem.* 106, 1493-502.
- Hromas, R., et al., 1996. Hematopoietic transcriptional regulation by the myeloid zinc finger gene, MZF-1. . *Curr. Top. Microbiol. Immunol.* 211, 159-64.
- Nguyen, H., Hiscott, J., Pitha, P. M., 1997. The growing family of interferon regulatory factors. *Cytokine Growth Factor Rev.* 8, 293-312.
- Takasaki, N., Kurokawa, D., Nakayama, R., Nakayama, J., Aizawa, S., 2007. Acetylated YY1 regulates Otx2 expression in anterior neuroectoderm at two cis-sites 90 kb apart. *EMBO J.* 26, 1649-59.
- Taniguchi, T., Ogasawara, K., Takaoka, A., Tanaka, N., 2001. IRF family of transcription factors as regulators of host defense. . *Annu. Rev. Immunol.* 19, 623-655.
- Thisse, C., Thisse, B., High Throughput Expression Analysis of ZF-Models Consortium Clones. ZFIN Direct Data Submission (<http://zfin.org>). 2005.
